# Supplementary material for: Scalable one-pot synthesis of amorphous iron-nickel-boride bifunctional electrocatalysts for enhanced alkaline water electrolysis
Source: Royal Society of Chemistry journal article supplement (doi:10.1039/d4se01073f), 2024-01-01
Supplement: d4se01073f1.pdf [file d4se01073f1.pdf]

## Supporting Information

# Scalable one-pot synthesis of amorphous iron-nickel-boride bifunctional electrocatalysts for enhanced alkaline water electrolysis

Bennett Schmitt<sup>a</sup>, Eva Murphy<sup>a</sup>, Sinny J. Trivedi<sup>b</sup>, Qiancheng Zhang<sup>b</sup>, Brian J. Rodriguez<sup>b</sup>,  
Aran Rafferty<sup>c</sup>, Raman Bekarevich<sup>d</sup>, Gabor Ersek<sup>e</sup>, Giuseppe Portale<sup>e</sup>, M. Veronica Sofianos<sup>a,\*</sup>

<sup>a</sup>*School of Chemical and Bioprocess Engineering, University College Dublin, Belfield, Dublin 4, Ireland*

<sup>b</sup>*School of Physics, and Conway Institute of Biomolecular and Biomedical Research, University College Dublin, Dublin 4, Ireland*

<sup>c</sup>*AMBER Research Centre, Naughton Institute, Trinity College Dublin, Dublin 2, D02PN40, Ireland*

<sup>d</sup>*Advanced Microscopy Laboratory, Centre for Research on Adaptive Nanostructures and Nanodevices (CRANN), Trinity College Dublin, Dublin 2, Ireland*

<sup>e</sup>*Physical Chemistry of Polymeric and Nanostructured Materials, Zernike Institute for Advanced Materials, University of Groningen, Nijenborgh 4, Groningen, 9747 AG The Netherlands*

\*E-mail: [mvsolianou@gmail.com](mailto:mvsolianou@gmail.com)

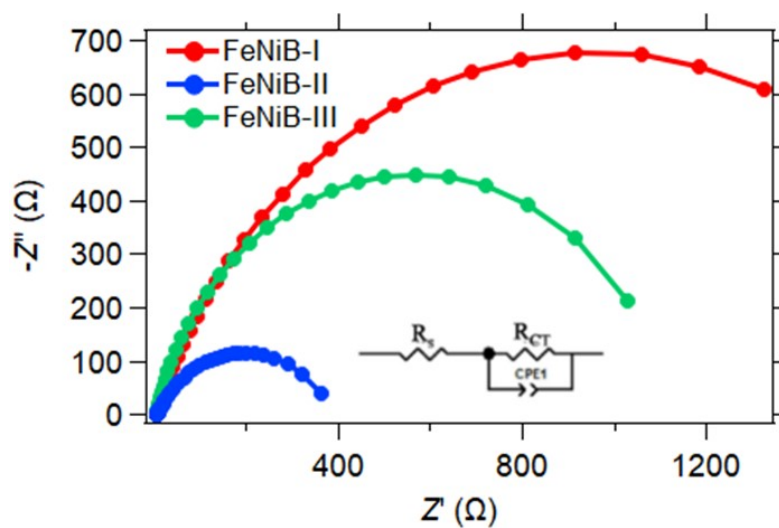

**Figure S1.** Nyquist plots obtained from EIS for FeNiB-I, FeNiB-II and FeNiB-III and the inset shows the equivalent circuit.

**Table S1.** Representing the resistance values obtained by fitting the EIS data from Nyquist plots.

| Sample    | $R_s$ ( $\Omega$ ) | Charge transfer resistance ( $\Omega$ ) | CPE Y0 (F)            |
|-----------|--------------------|-----------------------------------------|-----------------------|
| FeNiB-I   | 5.06               | 1908                                    | $4.41 \times 10^{-5}$ |
| FeNiB-II  | 6.38               | 1946                                    | $4.15 \times 10^{-5}$ |
| FeNiB-III | 5.03               | 1119                                    | $1.70 \times 10^{-5}$ |

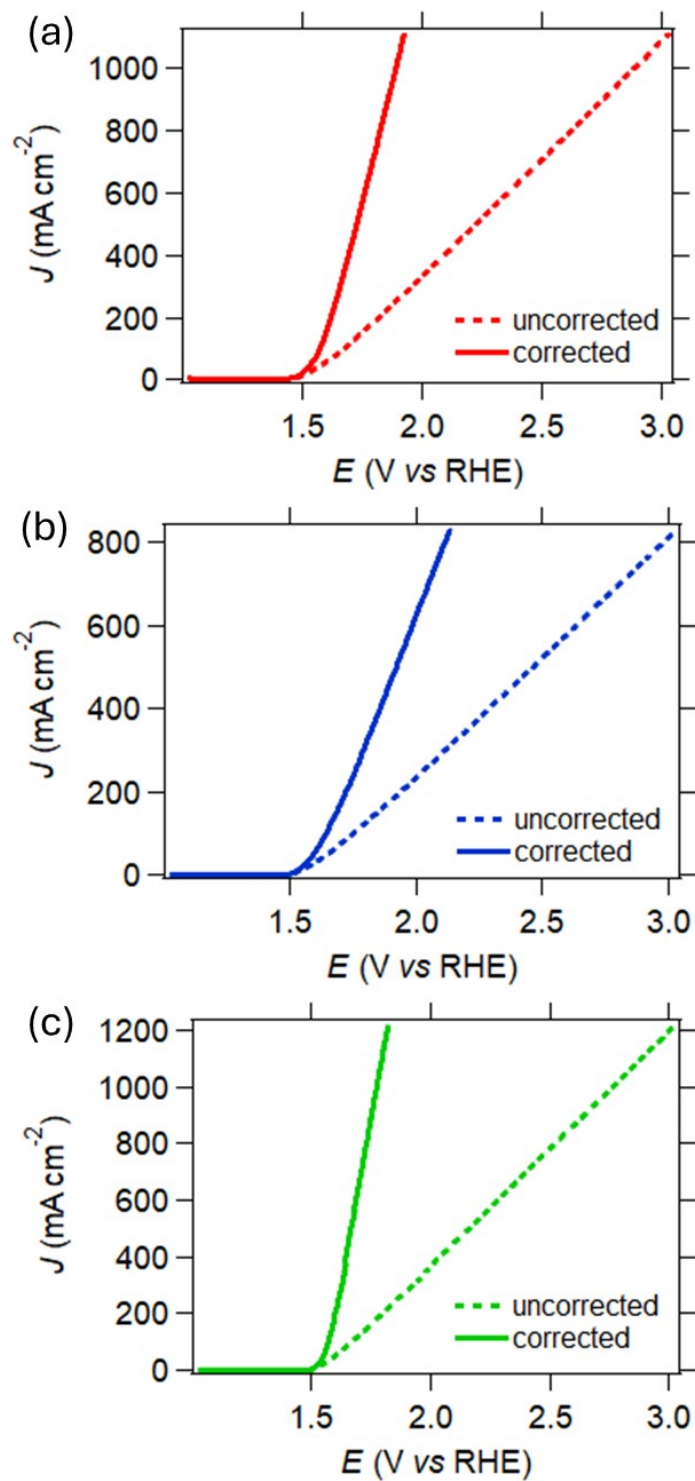

**Figure S2.** Corrected and un-corrected OER LSV curves of (a) FeNiB-I, (b) FeNiB-II, (c) FeNiB-III

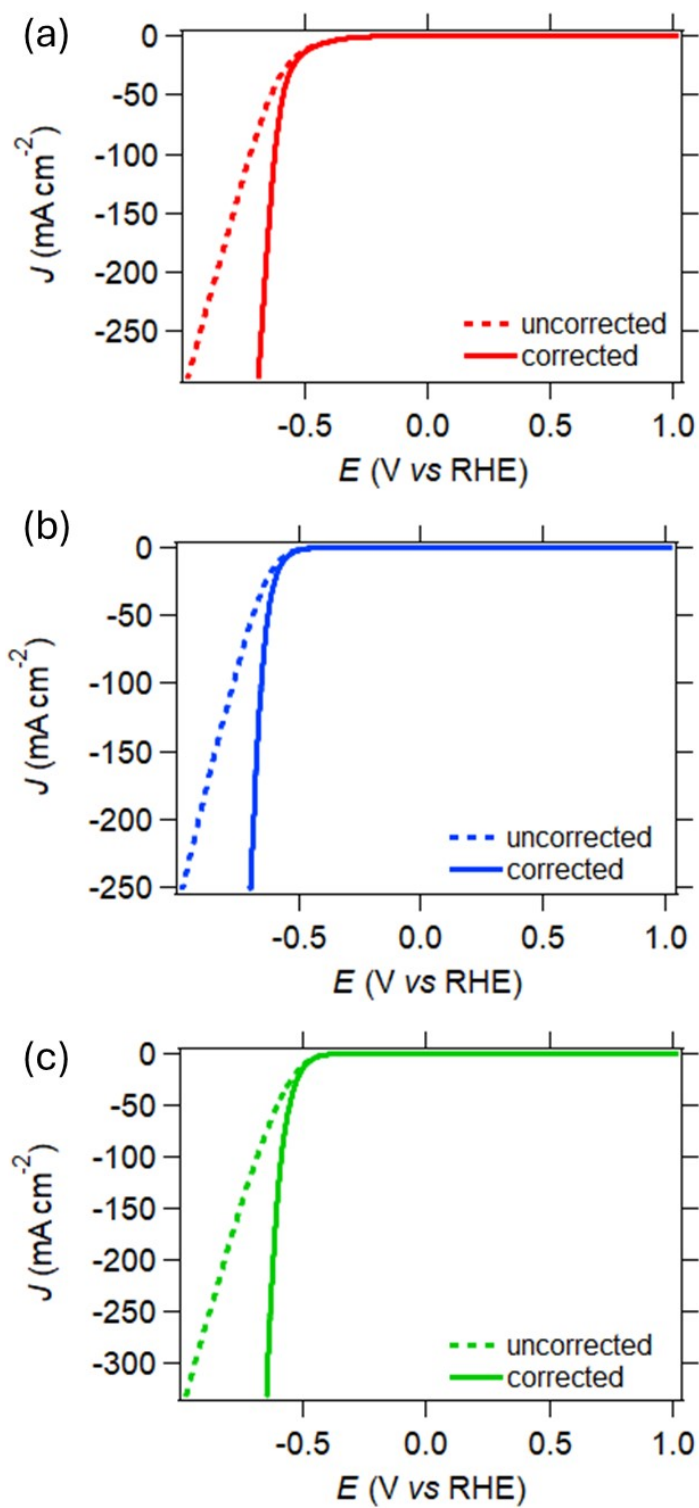

**Figure S3.** Corrected and un-corrected HER LSV curves of (a) FeNiB-I, (b) FeNiB-II, (c) FeNiB-III.

**Table S2.** The roughness of each sample, as determined from  $5 \mu\text{m} \times 5 \mu\text{m}$  AFM topography images ( $n = 3$ ).

| <b>Sample</b> | <b>Roughness (nm)</b> |
|---------------|-----------------------|
| FeNiB-I       | $126 \pm 25$          |
| FeNiB-II      | $254 \pm 23$          |
| FeNiB-III     | $67 \pm 10$           |

**Table S3.** Maximum current in a  $\pm 3.0$  V range, as determined from C-AFM IV measurements.

| <b>Sample</b>       | <b>Max current</b> |
|---------------------|--------------------|
| FeNiB-I (n=59/60)   | $4.9 \pm 1.5$ nA   |
| FeNiB-II (n=35/160) | $43.1 \pm 20.5$ pA |
| FeNiB-III (n=60/60) | $8.0 \pm 5.6$ nA   |

**Table S4.** Resistance, as determined from maximum current.

| <b>Sample</b>       | <b>Resistance</b>        |
|---------------------|--------------------------|
| FeNiB-I (n=59/60)   | $649 \pm 205$ M $\Omega$ |
| FeNiB-II (n=35/160) | $82 \pm 30$ G $\Omega$   |
| FeNiB-III (n=60/60) | $782 \pm 926$ M $\Omega$ |

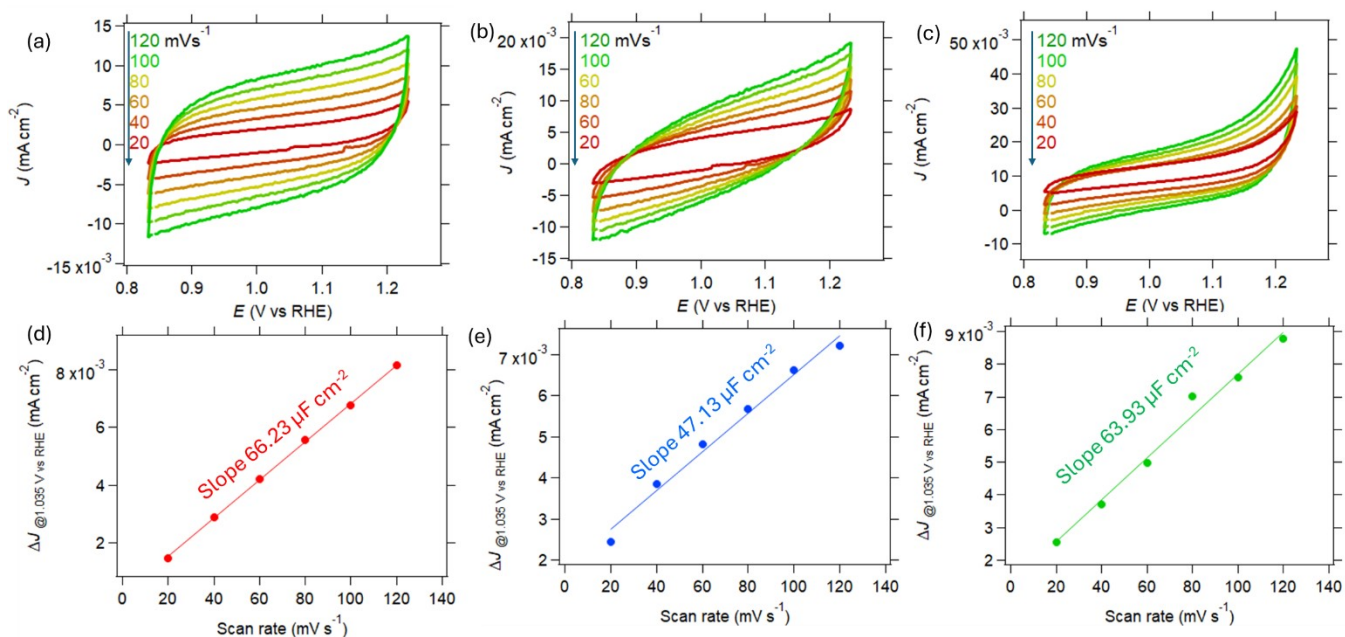

**Figure S4.** CV measurements in the non-Faradaic region (around the 0.62 V versus RHE) for FeNiB-I (a), FeNiB-II (b) and FeNiB-III (c). In this region scan rates were of 120, 100, 80, 60, 40, 20 mV s<sup>-1</sup> were used to measure the current density and calculate the double layer capacitance ( $C_{dl}$ ). The  $C_{dl}$  values were obtained by measuring gradients of current density versus scan rate for FeNiB-I (d), FeNiB-II (e) and FeNiB-III (f).

**Table S5.** Calculated double layer capacitance and electrochemical surface area.

| Sample    | $C_{dl}$ ( $\mu\text{F cm}^{-2}$ ) | ECSA ( $\text{cm}^2$ ) |
|-----------|------------------------------------|------------------------|
| FeNiB-I   | 132.46                             | 3.32                   |
| FeNiB-II  | 94.26                              | 2.36                   |
| FeNiB-III | 127.86                             | 3.20                   |
